# Supplementary material
Source: publisher site journal article supplement (https://www.dovepress.com/get_supplementary_file.php?f=316845.docx)
Supplement: Supplementary file 1 [file get_supplementary_file.php]

**Supplementary Material: Survey concerning the knowledge of one’s own blood type and willingness to donate blood.**

Medical record number: ………………….

1. Your gender is:

O Female

O Male

1. Your year of birth is:……….
2. Your marital status is:

O Single

O Married

O Divorced

O Widowed

1. What is your father’s level of education?

O Illiterate

O Read and write

O Elementary of intermediate

O Secondary school

O Diploma

O Bachelor

O Master or Doctoral

1. What is your mother’s level of education?

O Illiterate

O Read and write

O Elementary of intermediate

O Secondary school

O Diploma

O Bachelor

O Master or Doctoral

1. You are originally from which region in Saudi Arabia?

O Eastern

O Northern

O Central

O Western

O Southern

1. What is your blood group (ABO blood group)?

O A

O B

O AB

O O

O Not sure

1. What is your rhesus (Rh) blood type?

O Positive

O Negative

O Not sure

1. Do you have any chronic disease?

O Yes; please specify:……….

O No

1. Do you have any healthcare workers in your family?

O Yes

O No

1. Do you have a history of blood donation?

O Yes; How many times?...........

O No

1. Are you willing to donate blood during the next 12 months?

O Yes

O No

1. Do you have any previous surgery?

O Yes

O No

1. Do you have a history of blood transfusion?

O Yes

O No
